# Supplementary material
Source: PubMed Central journal article supplement (PMC2814530)

Brightfield

Epifluorescence

P-selectin  
DKO 40 wk  
+ plaque

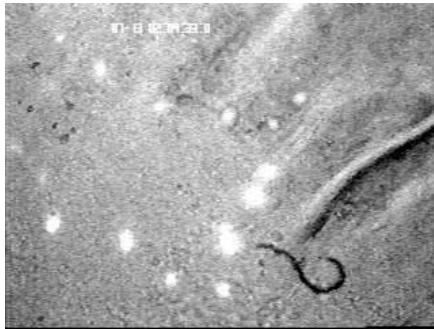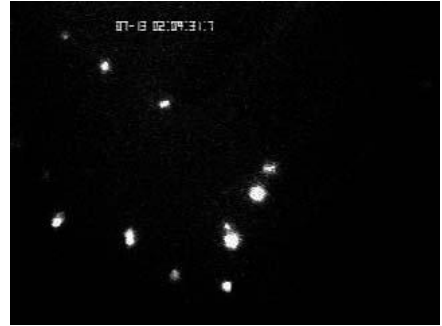

P-selectin  
DKO 20 wk  
- plaque

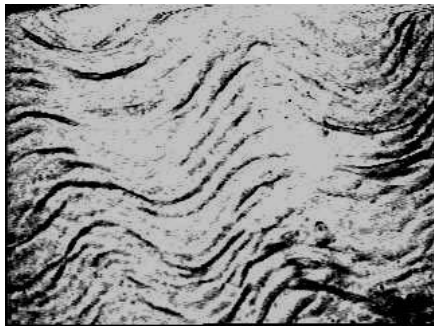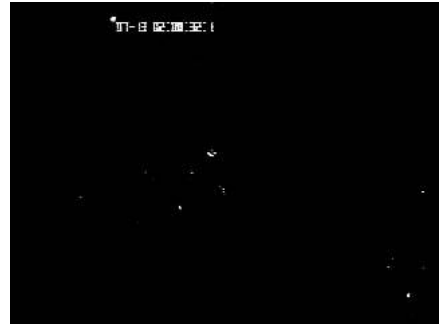

VCAM  
DKO 20 wk  
brachioceph

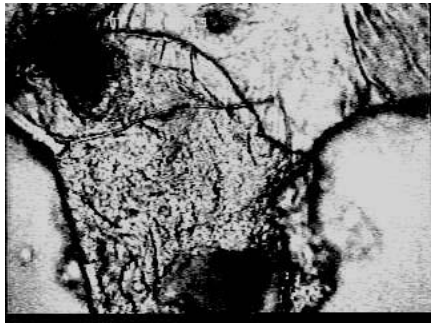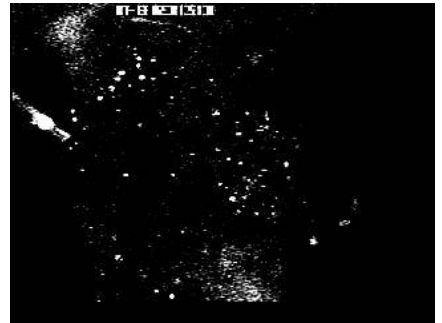

VCAM  
DKO 40 wk  
+ plaque

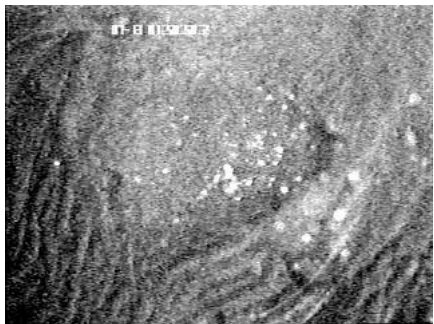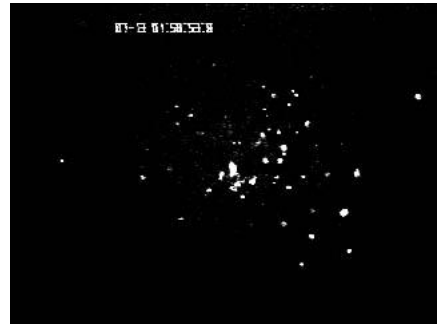

Supplement: NIHMS161186-supplement-Supp3.pdf [file NIHMS161186-supplement-Supp3.pdf]
