# Supplementary material
Source: PubMed Central journal article supplement (PMC2814530)

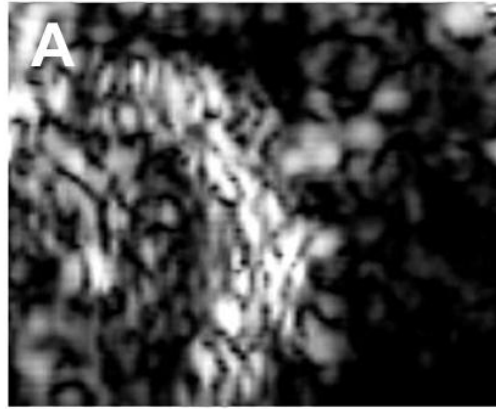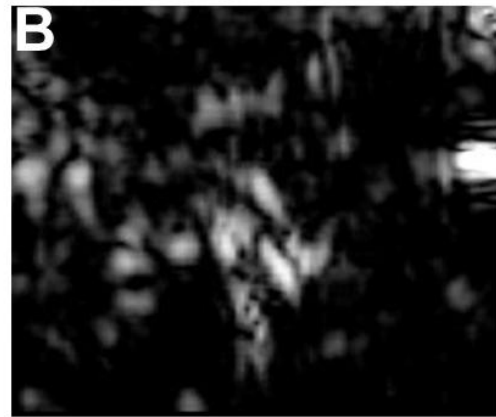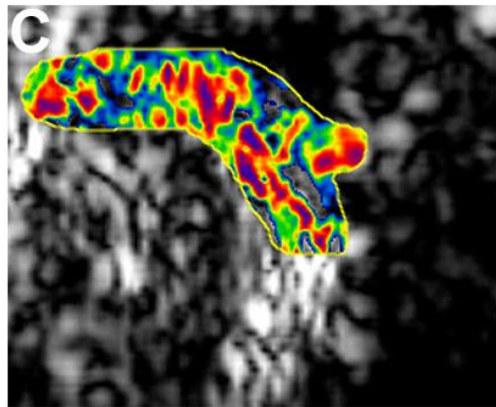

Supplement: NIHMS161186-supplement-Supp1.pdf [file NIHMS161186-supplement-Supp1.pdf]

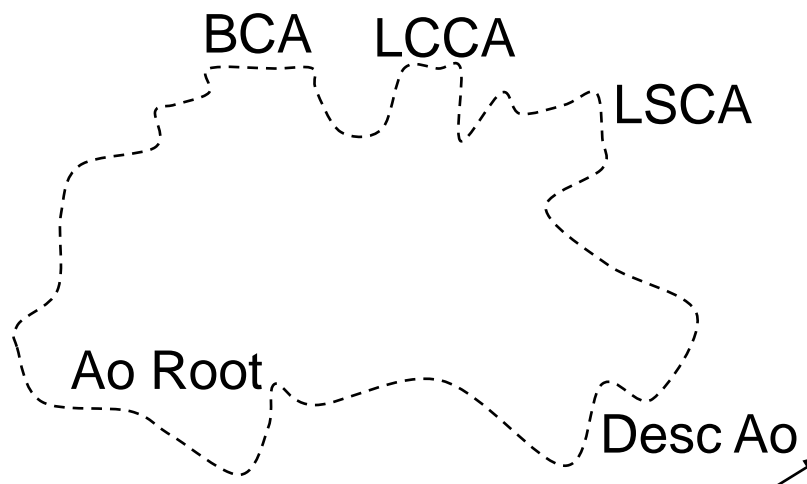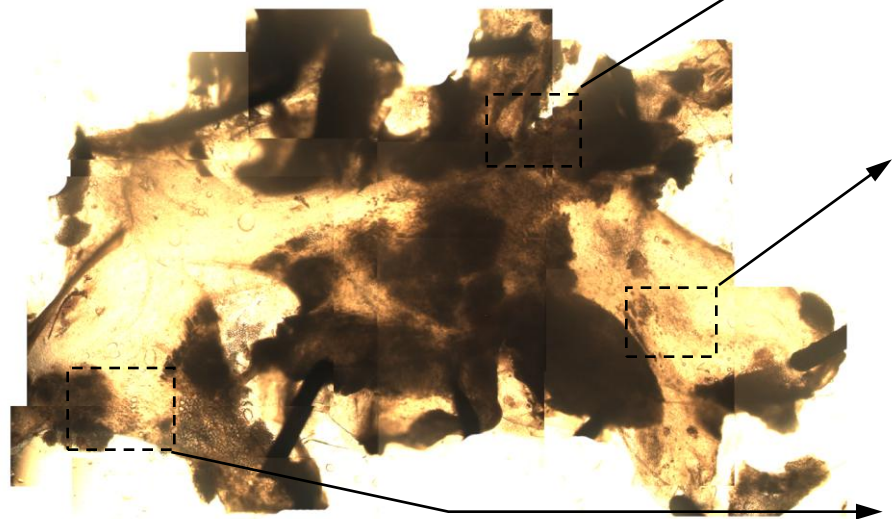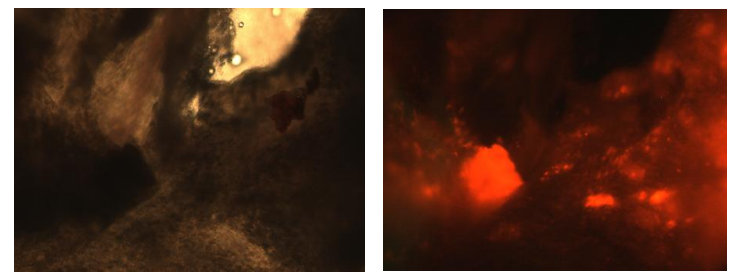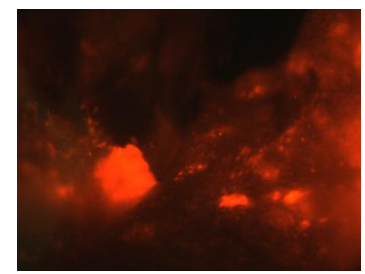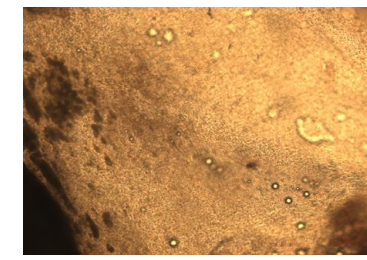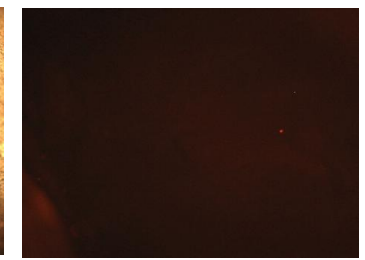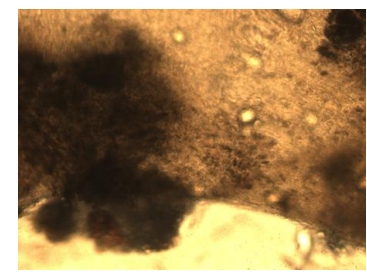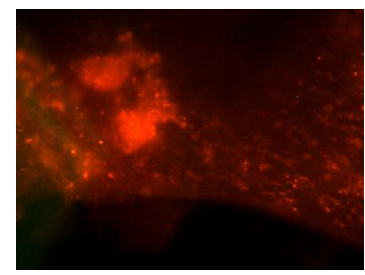

Supplement: NIHMS161186-supplement-Supp2.pdf [file NIHMS161186-supplement-Supp2.pdf]
